# Supplementary material for: Black Poplar (Populus nigra L.) Root Extracellular Trap, Structural and Molecular Remodeling in Response to Osmotic Stress
Source: MDPI journal article supplement (doi:10.3390/cells12060858), 2023-03-09
Supplement: s1 [file s1]

---

Busont et al. Supplemental data

**Table S1:** Monoclonal antibodies used in immunocytochemical characterization of glycopolymers in RET (mucilage and AC-DCs) and root (meristematic and elongation zones) under control and strong osmotic stress.

| Glycopolymer            | mAb   | Epitope                                                                                      | Reference |
|-------------------------|-------|----------------------------------------------------------------------------------------------|-----------|
| Homogalacturonan        | LM19  | Homogalacturonan with low degree of esterification                                           | [78]      |
|                         | LM20  | Homogalacturonan with high degree of esterification                                          |           |
| Rhamnogalacturonan I    | LM5   | [ $\beta$ (1-4)galactan]>3<br>Rhamnogalacturonan I                                           | [79]      |
|                         | LM6   | [ $\alpha$ (1-5) highly branched arabinan]5/6<br>Rhamnogalacturonan I                        | [80]      |
| Xylogalacturonan        | LM8   | Xylogalacturonan associated with cell detachment and separation                              | [81]      |
| Xyloglucan              | LM25  | Xylosylated/galactosylated xyloglucan (XXLG and XLLG)                                        | [82]      |
| Xylan                   | LM10  | nonreducing end of xylans                                                                    | [83]      |
| Heteromanan             | LM21  | $\beta$ -(1,4) linked mannan from DP2 to DP5 (mannan, glucomannan and                        | [84]      |
| Arabinogalactan protein | JIM8  | unknown                                                                                      | [85]      |
|                         | JIM13 | $\beta$ GlcA-(1,3)- $\alpha$ GalA-(1,2)-Rha                                                  | [86,87]   |
|                         | JIM14 | internal epitope on $\beta$ -1,6-linked galactans                                            | [83]      |
|                         | JIM16 | $\beta$ -1,3-linked galactan backbone when substituted with a single $\beta$ -1,6-linked Gal |           |
| Extensin                | LM1   | unknown                                                                                      | [88]      |
|                         | JIM12 | unknown                                                                                      | [89]      |

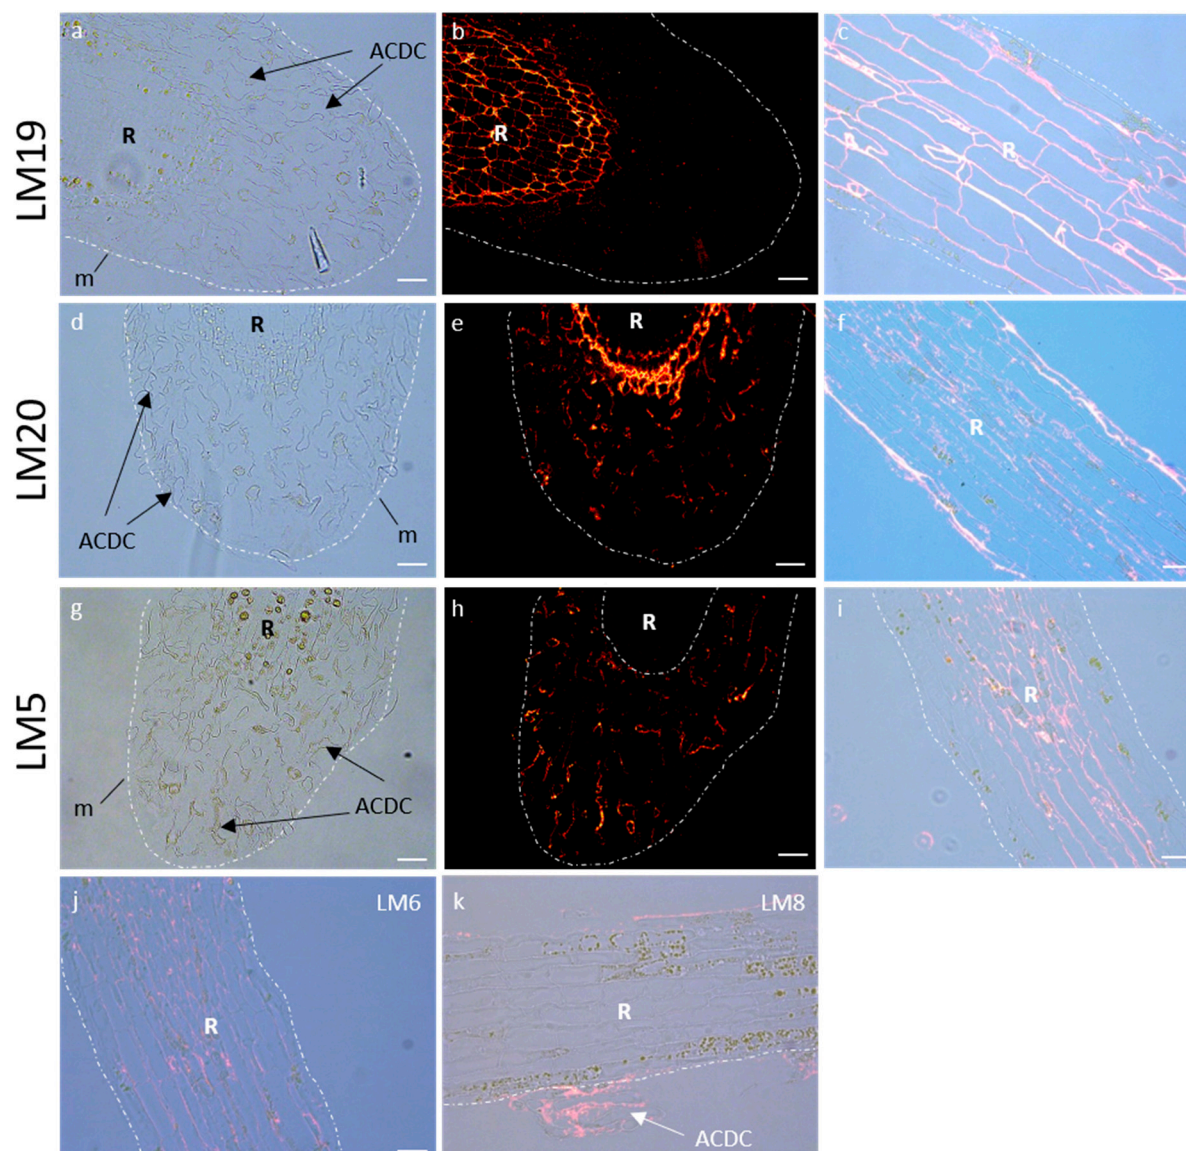

**Figure S1.** Immunocytochemical characterization of pectins in a control *P. nigra* root tip. LM19 weakly esterified homogalacturonan (a-c), LM20 highly esterified homogalacturonan (d-f), LM5 galactan chains from rhamnogalacturonan I (g-i), LM6 arabinan chains from rhamnogalacturonan I (j), LM8 xylogalacturonan (k). Left column: bright field images defining mucilage and AC-DC (except j), central column: corresponding images with fluorescence (except k), right column (and j, k): overlay of bright field/fluorescence images of elongation zone. RET labeling showed the detection of LM19 and LM5 in the AC-DC cell wall and no labeling of LM20. Root elongation zone presented a strong signal with LM19, contrary to LM20, LM5 and LM6 which showed a light signal. No signal was detected with LM8. AC-DC: root associated cap derived cell, m: mucilage, R: root. Bars: 25  $\mu$ m.

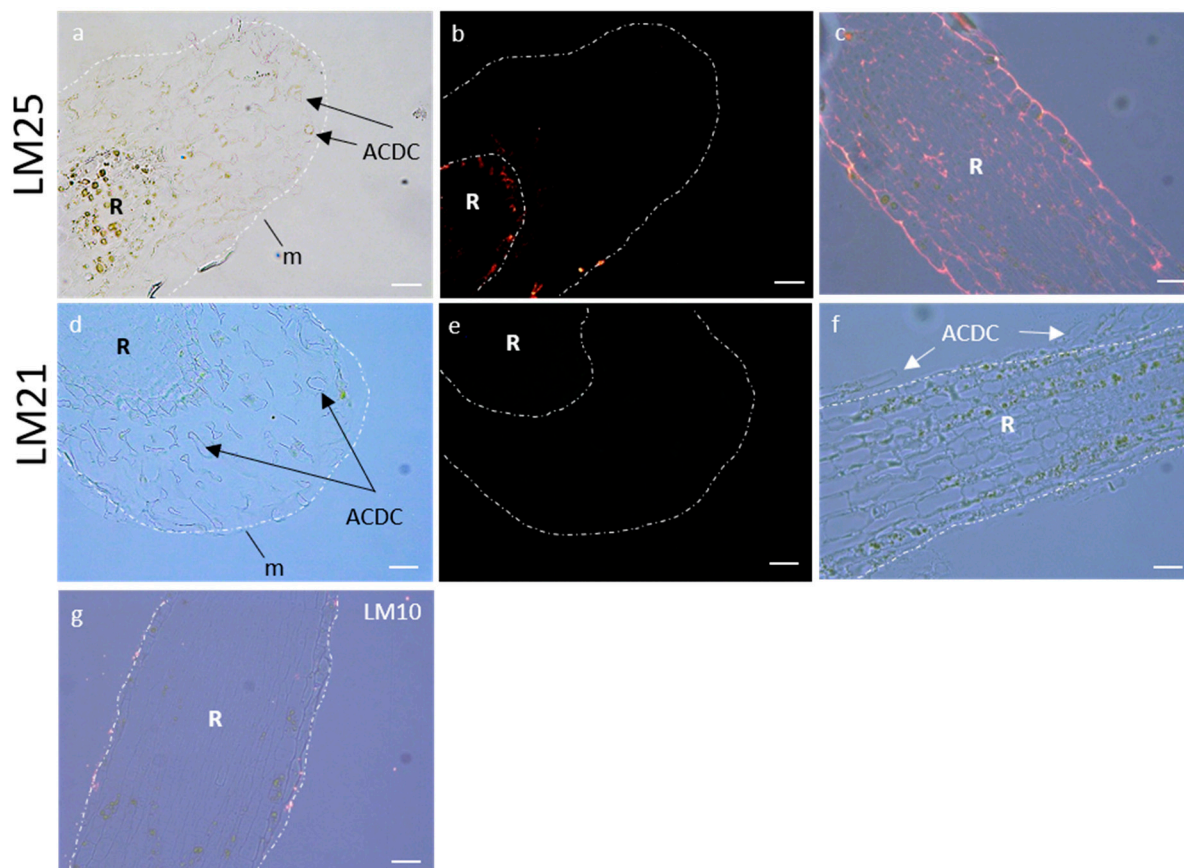

**Figure S2.** Immunocytochemical characterization of hemicelluloses in a control *P. nigra* root tip. LM25 galactosylated xyloglucan (a-c), LM21 heteromannan (d-f), LM10 xylan (g). Left column: bright field images defining mucilage and AC-DC (except g), central column: corresponding images with fluorescence, right column (and g): overlay of bright field/fluorescence images of elongation zone. RET labeling showed no detection of LM25 and LM21. Root elongation zone presented a light signal with LM25, contrary to LM21 and LM10 which showed no signal. AC-DC: root associated cap derived cell, m: mucilage, R: root. Bars: 25  $\mu$ m.

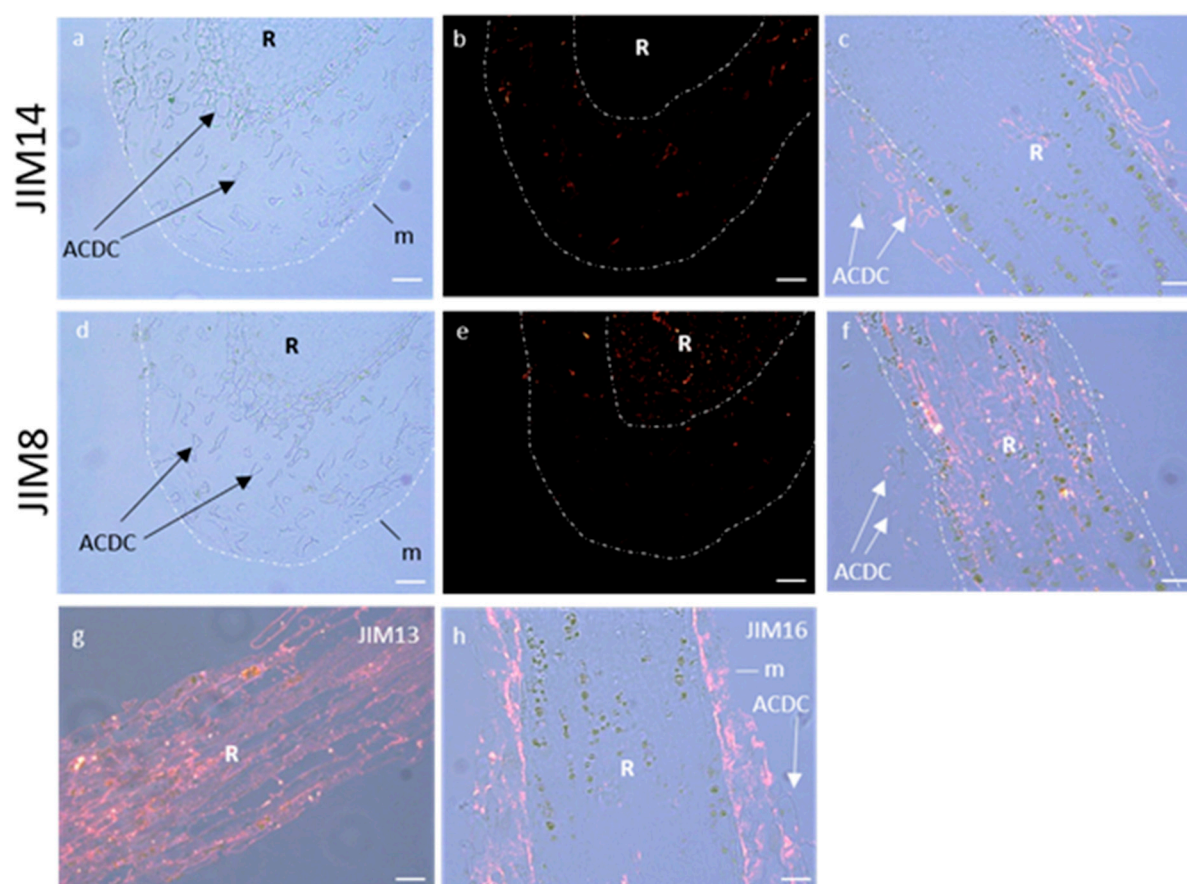

**Figure S3.** Immunocytochemical characterization of arabinogalactan proteins in a control *P. nigra* root tip. JIM14 (a-c), JIM8 (d-f), JIM13 (g), JIM16 (h). Left column: bright field images defining mucilage and AC-DC (except g), central column: corresponding images with fluorescence (except h), right column (and g, h): overlay of bright field/fluorescence images of elongation zone. RET labeling showed a weak fluorescence signal of JIM14 on the AC-DC cell wall and no signal with JIM8. Root elongation zone presented a strong signal with JIM8 and JIM13, contrary to JIM14 and JIM16 which showed no signal. AC-DC: root associated cap derived cell, m: mucilage, R: root. Bars: 25  $\mu$ m.

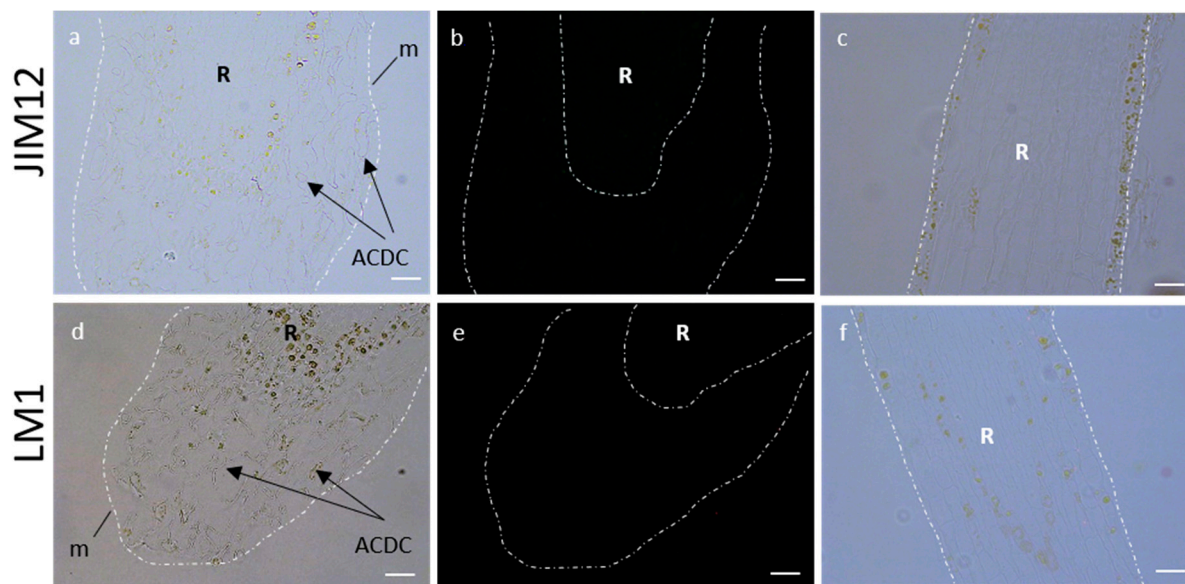

**Figure S4.** Immunocytochemical characterization of extensins in a control *P. nigra* root tip. JIM12 (a-c), LM1 (d-f). Left column: bright field images defining mucilage and AC-DC, central column: corresponding images with fluorescence, right column: overlay of bright field/fluorescence images of elongation zone. RET and root labeling showed no detection of JIM12 and LM1. AC-DC: root associated cap derived cell, m: mucilage, R: root. Bars: 25  $\mu$ m.

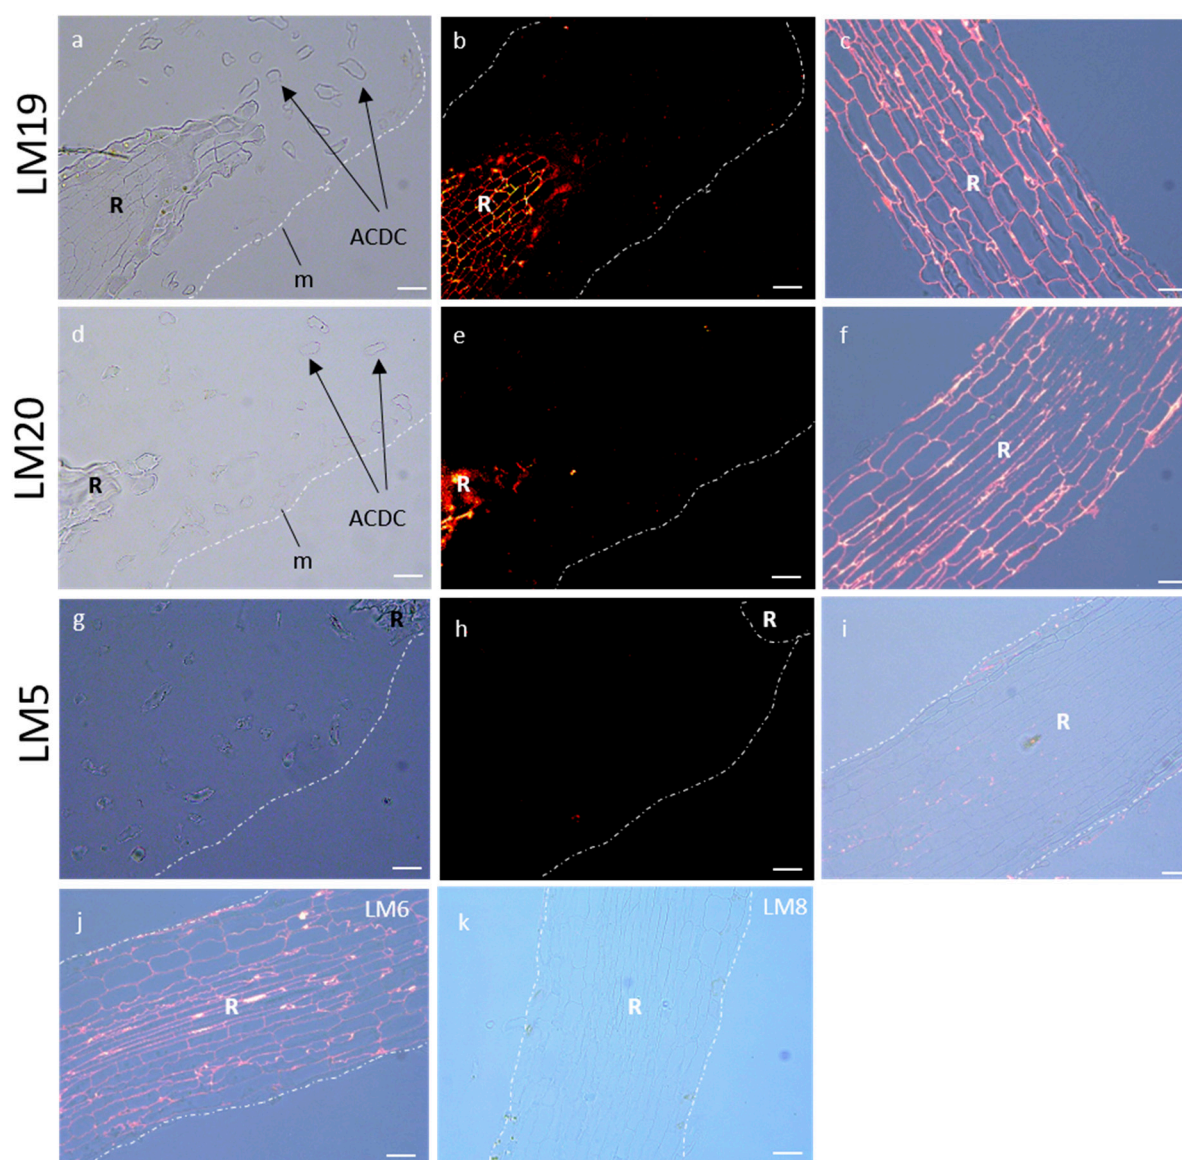

**Figure S5.** Immunocytochemical characterization of pectins in a *P. nigra* root tip under osmotic stress. LM19 weakly esterified homogalacturonan (a-c), LM20 highly esterified homogalacturonan (d-f), LM5 galactan chains from rhamnogalacturonan 1 (g-i), LM6 arabinan chains from rhamnogalacturonan 1 (j), LM8 xylogalacturonan (k). Left column: bright field images defining mucilage and AC-DC (except j), central column: corresponding images with fluorescence (except k), right column (and j, k): overlay of bright field/fluorescence images of elongation zone. RET labeling showed no detection of LM19, LM20 and LM5. Root elongation zone presented a strong signal with LM19, LM20 and LM6 contrary to LM5 which showed a light signal. No signal was detected with LM8. AC-DC: root associated cap derived cell, m: mucilage, R: root. Bars: 25 μm.

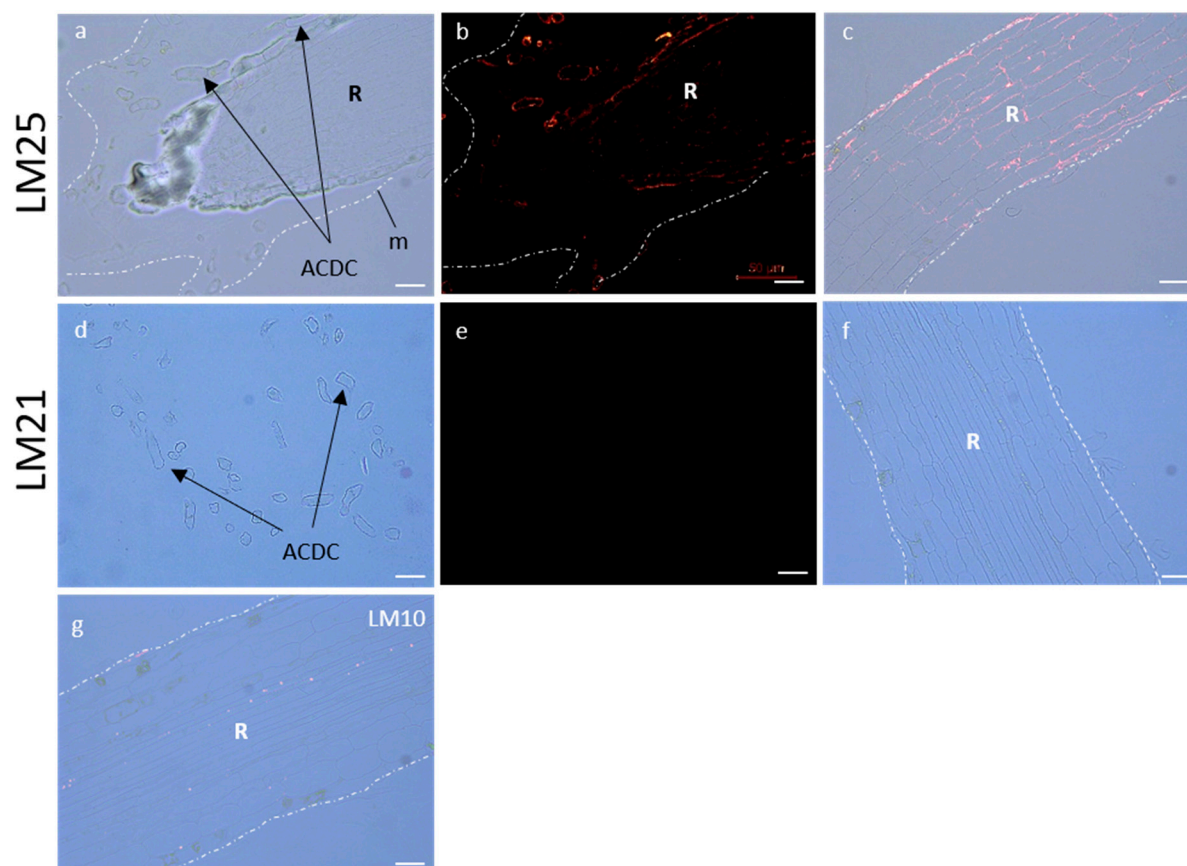

**Figure S6.** Immunocytochemical characterization of hemicelluloses in a *P. nigra* root tip under osmotic stress. LM25 galactosylated xyloglucan (a-c), LM21 heteromannan (d-f), LM10 xylan (g). Left column: bright field images defining mucilage and AC-DC (except g), central column: corresponding images with fluorescence, right column (and g): overlay of bright field/fluorescence images of elongation zone. RET labeling showed a weak fluorescence signal of AC-DC cell wall with LM25 and no signal with LM21. Root elongation zone presented a light signal with LM25, contrary to LM21 and LM10 which showed no signal. AC-DC: root associated cap derived cell, m: mucilage, R: root. Bars: 25  $\mu$ m.

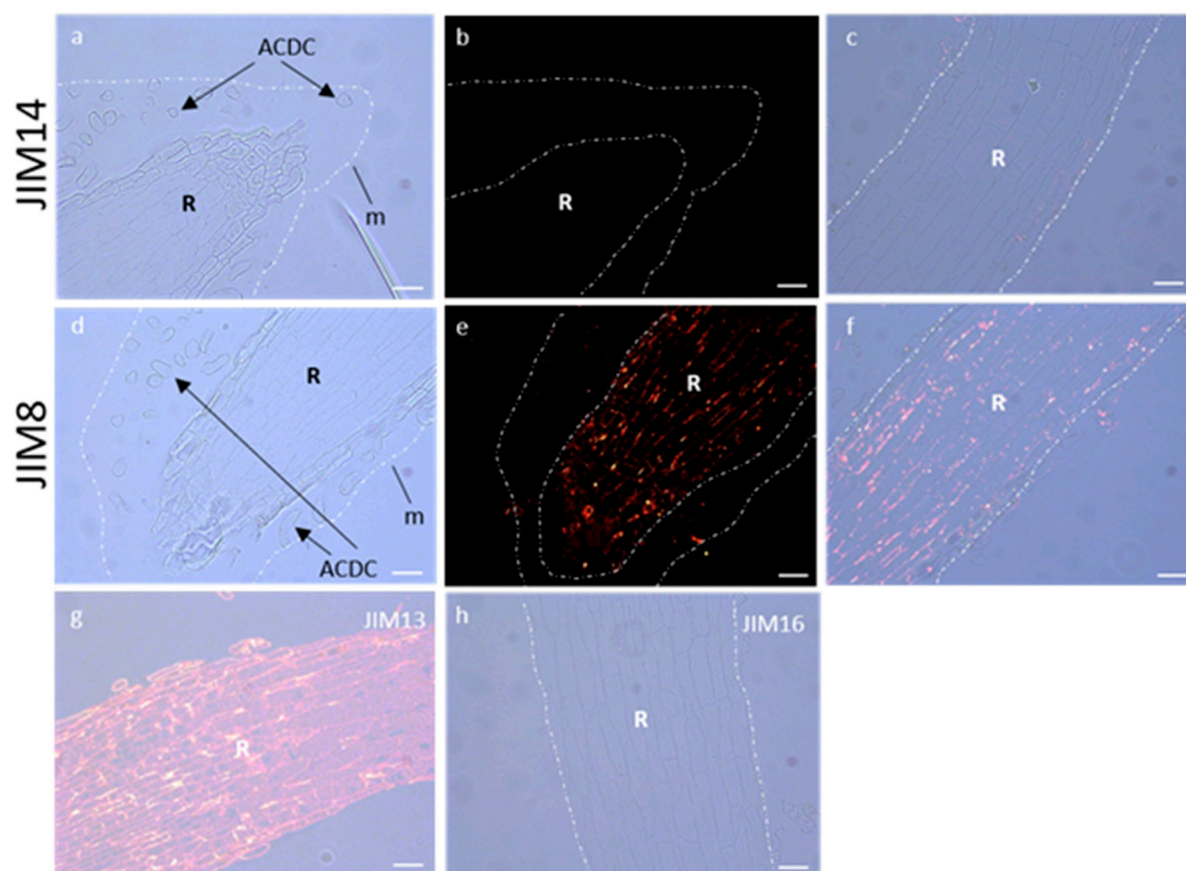

**Figure S7.** Immunocytochemical characterization of arabinogalactan proteins in a *P. nigra* root tip under osmotic stress. JIM14 (a-c), JIM8 (d-f), JIM13 (g), JIM16 (h). Left column: bright field images defining mucilage and AC-DC (except g), central column: corresponding images with fluorescence (except h), right column (and g, h): overlay of bright field/fluorescence images of elongation zone. RET labeling showed no fluorescence signal with JIM14 and JIM8. Root elongation zone presented a strong signal with JIM13 and JIM8, contrary to JIM14 and JIM16 which showed no signal. AC-DC: root associated cap derived cell, m: mucilage, R: root. Bars: 25  $\mu$ m.

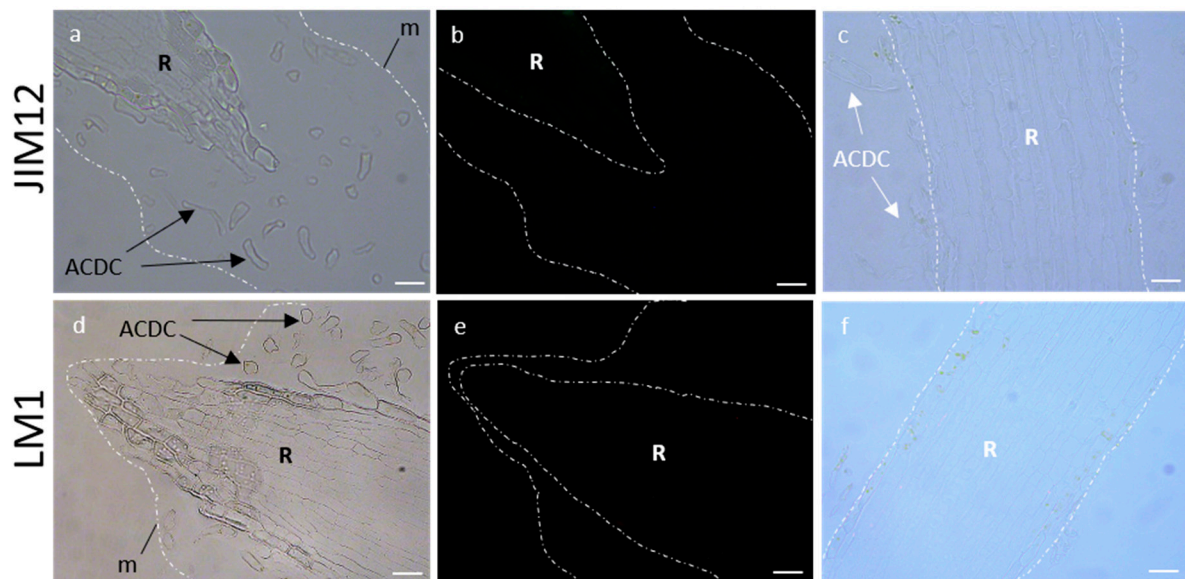

**Figure S8.** Immunocytochemical characterization of extensins in a *P. nigra* root tip under osmotic stress. JIM12 (a-c), LM1 (d-f). Left column: bright field images defining mucilage and AC-DC, central column: corresponding images with fluorescence, right column: overlay of bright field/fluorescence images of elongation zone. RET and root labeling showed no detection of JIM12 and LM1. AC-DC: root associated cap derived cell, m: mucilage, R: root. Bars: 25  $\mu$ m.
